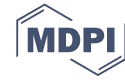

Article

# Cell substrate patterns driven by curvature-sensitive actin polymerization: waves and podosomes

Moshe Naoz <sup>1,†,‡</sup> and Nir S. Gov <sup>2,\*</sup>

<sup>1</sup> Affiliation 1; e-mail@e-mail.com

<sup>2</sup> Affiliation 2; e-mail@e-mail.com

\* Correspondence: nir.gov@weizmann.ac.il

Version February 17, 2020 submitted to Cells

**Abstract:** Cells adhered to an external solid substrate are observed to exhibit rich dynamics of actin structures on the basal membrane, which are distinct from those observed on the dorsal (free) membrane. Here we explore the dynamics of curved membrane proteins, or protein complexes, that recruit actin polymerization when the membrane is confined by the solid substrate. Such curved proteins can induce the spontaneous formation of membrane protrusions on the dorsal side of cells. However, on the basal side of the cells, such protrusions can only extend as far as the solid substrate and this constraint can convert such protrusions into propagating wave-like structures. We also demonstrate that adhesion molecules can stabilize localized protrusions, that resemble some features of podosomes. This coupling of curvature and actin forces may underlie the differences in the observed actin-membrane dynamics between the basal and dorsal sides of adhered cells.

**Keywords:** Actin waves; curved proteins; dynamic instability; podosomes

## 1. Introduction

The actin cortex of cells is the prominent driver of membrane shape deformations, which exhibit a huge variability, from propagating waves to stable protrusions. It is often observed that the actin-membrane dynamics of adhered cells is very different between the basal and dorsal sides. The main difference between the two side is that on the basal side the membrane is held at close proximity to the solid substrate, while on the dorsal side the membrane is usually free to deform into the surrounding fluid. In this paper we explore theoretically the actin-membrane dynamics in the presence of the confinement of the substrate, when the actin polymerization is nucleated by curved membrane complexes.

Cells exhibit a variety of propagating waves of actin polymerization on their basal plasma membrane, which are observed under many conditions such as the initial formation of adhesion [1] and during cell motility [2,3,4]. When these waves propagate on the dorsal side of an adhered cell, or along its perimeter edge, they are accompanied by large membrane deformations. However, when these waves propagate along the basal membrane, at the interface between the cell and the underlying solid substrate, such membrane deformations have not been unambiguously observed. These basal actin waves have been studied intensively [5,6,7,8], and many of their features exposed. Mostly these waves have been treated in the framework of reaction-diffusion models [8], where membrane deformations do not play a role.

In previous works [9,10] we have investigated theoretically and experimentally the possible role of curved activators of actin polymerization in the propagation of membrane-actin waves. In these works the positive feedback is in the form of an actin nucleator that has a convex shape (such as the I-BAR protein IRsp53 for example [11,12]), such that it tends to accumulate at the tips of membrane protrusions that are driven by the actin polymerization force. The negative feedback, which is necessary

35 for wave propagation, can be provided by the contractile force of myosin-II [9] or the recruitment of  
36 concave-shaped actin nucleators (such as the BAR family proteins, Tuba for example [13]) [10]. More  
37 recent work proposed that the negative feedback for propagating basal actin waves arises from the  
38 actin network itself [14].

39 In this paper we explore the dynamics of the membrane-actin system in the presence of only the  
40 convex nucleator, but in the presence of a confining boundary which represents the effect of the solid  
41 substrate. When there is no confinement, our model predicts that this system can become unstable  
42 and drive the spontaneous initiation of membrane protrusions through a Turing-type instability  
43 [15,16,17,18,19], as is indeed observed in experiments [20,21,22,23]. We show that in the presence of a  
44 confining boundary this system indeed supports protrusions, which are however modified compared  
45 to those growing on a free membrane: protrusions may split, and may even convert into propagating  
46 rings. These theoretical results may explain some puzzling features observed for actin waves that  
47 propagate at the substrate-attached cell surface, such as their tendency to form doublets of concentric  
48 actin fronts [8,24,25].

49 In the last section we demonstrate that by adding adhesion of the membrane to the substrate  
50 localized protrusive structures can be stabilized, and these share some features with localized adhesion  
51 structures called podosomes.

## 52 2. Results

### 53 2.1. Expanding ring of membrane-actin wave

54 Our model is based on the description of the membrane shape in terms of a single height variable  
55  $h(x, y)$ , which is appropriate for small membrane deformations (Monge gauge). This is applicable for  
56 the present system, where the membrane is adhered to a solid substrate that confines the extent of its  
57 normal deflection. On the membrane we consider a density field  $n(x, y)$  of "activator" proteins, which  
58 are both curved and recruit the polymerization of actin. These "proteins" may therefore represent  
59 bound complexes that contain several proteins, that together have this combination of properties.  
60 The curved membrane complexes can diffuse on the fluid membrane, as well as form high density  
61 aggregations.

62 We solve the equations of motion for the two fields (10,11) numerically using an explicit finite  
63 difference scheme with periodic boundary conditions. We first investigate the response of the system  
64 to a single small gaussian perturbation (see Supplementary Movie S1, Fig.1). We choose values for the  
65 parameters of the model such that we are in the unstable regime, and protrusions grow spontaneously.  
66 However, the numerical values of these parameters are not fitted to any particular experimental  
67 measurement, and are simply chosen to demonstrate the qualitative behavior over realistic length and  
68 time scales.

69 As shown in Fig.1a, the perturbation initially grows into a protrusion with a lateral width of the  
70 order of the most unstable wavelength  $\lambda_c$  (Eq.12). During this growth stage, the protrusive force of  
71 the actin locally squeezes the layer of long molecules (glycocalix) that buffers the outer surface of the  
72 membrane from the substrate (Fig.8). Due to the positive feedback, the density of activators increases  
73 at the tip of the growing protrusion (note that throughout the paper the plots of the "activator density"  
74 is with respect to the background, uniform density  $n-n_0$ ).

75 Once the protrusion's height exceeds  $h_{\text{wall}}$ , the substrate limits further growth and the membrane  
76 shape tends to match the contour of the substrate. If the substrate is sufficiently flat the activators  
77 which were aggregated at the tip of the protrusion disperse. Note that we do not consider at this stage  
78 any adhesion to the substrate, so that the activators remain mobile on the membrane even when it is in  
79 contact with the substrate. The result is a rolling instability where the activators continually aggregate  
80 at shoulders of the protrusion (Fig.1b,e), which are the location of the highest convex curvature. The  
81 aggregation of activators increases the protrusive force exerted on the shoulders which are therefore

82 results in the membrane deformation moving radially outwards. The rolling instability results in the  
83 protrusion developing into an expanding circular structure.

84 We emphasize that this model includes only normal deformations of the membrane, so the actin  
85 force does not directly push the membrane sideways along the substrate. The movement of the  
86 protrusion laterally is driven by the flow of the curved activators, and the coupling to the protrusive  
87 force of the actin polymerization. Note that a similar behavior is expected for curved activators that  
88 adsorb in a curvature-dependent manner from the cytoplasm [10].

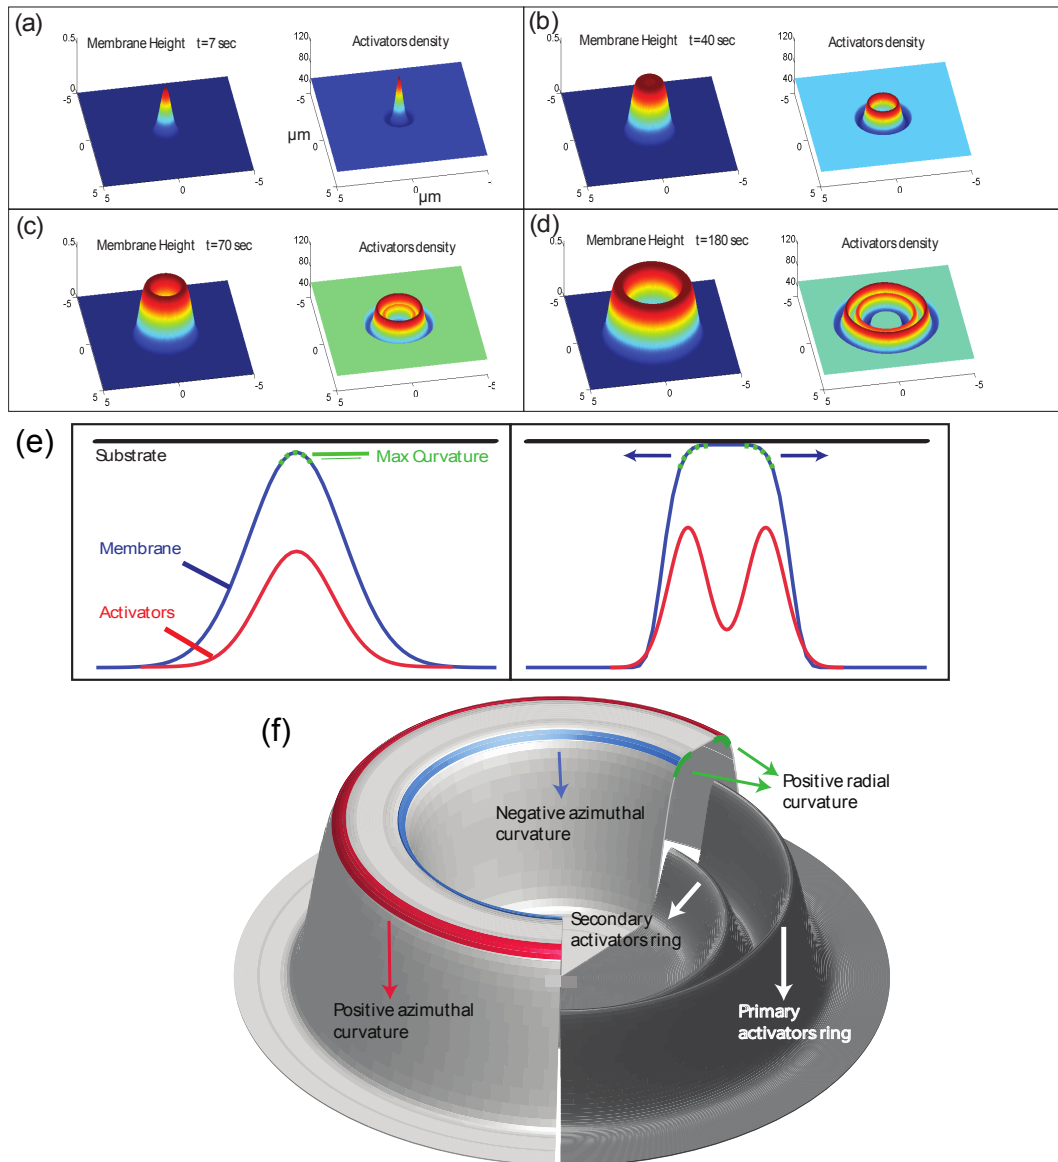

**Figure 1.** (a-d) Numerical integration of equations (10,11) over a period of 3 minutes, over a membrane segment of size  $10 \times 10 \mu\text{m}^2$ . The parameter values used:  $D = 0.1 \mu\text{m}^2/\text{s}$ ,  $\bar{H} = -10 \mu\text{m}^{-1}$ ,  $n_0 = 50 \mu\text{m}^{-2}$ ,  $n_s = 300 \mu\text{m}^{-2}$ ,  $A = 3.8 \cdot 10^{-5} \text{kg} \mu\text{m}^5 \text{sec}^{-2}$ ,  $\kappa = 20 \text{k}_B \text{T}$ ,  $\sigma = 8.28 \cdot 10^{-5} \text{kg} \mu\text{m}^4 \text{sec}^{-2}$ ,  $\mu = 1.66 \cdot 10^6 \text{sec} \mu\text{m}^{-2} \text{kg}^{-1}$ ,  $h_{\text{wall}} = 0.5 \mu\text{m}$ . (a) Initial growth of the protrusion, prior to contact with the substrate. Note that throughout the paper the plots of the "activator density" is with respect to the background, uniform density  $n-n_0$ . (b) The protrusion after it comes into contact with the substrate and the membrane at the tip becomes flat. As a consequence an activator ring are formed at the edge of the membrane protrusion, where there is large positive curvature. (c) The membrane at the disk center has retracted back towards the unperturbed position at  $h = 0$ , and a secondary inner ring of activators begins to form. (d) The membrane ring and two activator rings expand further. (e) An illustration of the mechanism that drives the expansion of the protrusion radially outwards. When the membrane reaches the flat substrate its curvature diminishes and the activators are then aggregated at the location of the highest curvature - the shoulders. However, since once the activators aggregate they push the membrane against the substrate which results in the flattening of the shoulders and the formation of new shoulders further away from the protrusion center. (f) A diagram of the structure of the expanding ring. Marked in green are the regions high in curvature in the radial direction which is similar in magnitude for both the inner and the outer rings. Marked in red is the outer radius curvature in the azimuthal direction which is positive and marked in blue is the inner radius azimuthal curvature which is negative. Also shown is the concentration of activators which aggregate into two rings at the outer and inner radii of the membrane ring. The concentration of the outer activators ring is higher than the concentration at the inner ring due to the different azimuthal curvatures.

89 The membrane's initial shape is an expanding cylinder and the activators form a ring at the  
90 membrane perimeter of the protrusion (Fig.1b). Once the radius of the membrane cylinder is sufficiently  
91 large, the membrane at the center of the cylinder, which is no longer supported by a surplus of actin  
92 protrusive force, falls back to the initial height (at  $h = 0$ ). This happens due to the inherent repulsion  
93 between the membrane and the substrate, cause by the "cushion" layer of long molecules (glycocalix)  
94 that cover the outer surface of the membrane (Fig.8). When the membrane cylinder changes into a  
95 ring shape, a secondary inner ring of activators forms at the inner shoulder of the membrane ring  
96 (Fig.1c,d,f), where there is high convex curvature.

97 The amplitude of the activators density at the inner ring is initially considerably smaller than  
98 the outer ring amplitude. The reason for the amplitude difference is the difference in the mean  
99 curvature between the outer and inner rings. While the radial curvatures (the curvature along the radial  
100 coordinate centered at the protrusion center) are very similar, the azimuthal curvature (the curvature  
101 along the angular coordinate), which is of the order of  $1/R$  ( $R$  is the radius of the ring) is positive  
102 at the outer radius and negative at the inner radius (Fig.1f). Therefore at small radii, the difference  
103 in the mean curvatures is significant. The higher convex curvature at the outer ring means that the  
104 convex activators aggregate there more and the resulting protrusive force exerted on the membrane is  
105 stronger. This imbalance results in the continued outwards expansion of the ring. Note that the inner  
106 actin ring does *not* move inwards, since the curved actin activators flow towards increasing mean  
107 convex curvature, which decreases if the ring would shift to a smaller radius. Therefore the inner ring  
108 is also propagating outwards, at a velocity which is very similar to that of the outer ring, maintaining  
109 a roughly constant distance between them.

110 However, as the ring radius grows larger, the difference between the azimuthal curvatures at  
111 the inner and outer rings diminishes and the difference in the amplitudes of the activators rings (and  
112 therefore the protrusive force) decreases, which reduces the speed of the ring expansion (Fig.2a,b). In  
113 Fig.2c we plot the activators density at the inner and outer rings as function of the local mean curvature,  
114 and in Fig.2d we plot the ring velocity as a function of the difference between the density of activators  
115 at the inner and outer rings. The plot shows that the velocity is proportional to that difference, i.e  
116  $V_{\text{ring}} \propto \Delta n = n_{\text{outer}} - n_{\text{inner}}$ . The results indicate that the ring velocity is indeed proportional to the  
117 imbalance in the pushing force of the two actin rings, and explains why it decreases as:  $V_{\text{ring}} \sim 1/R$   
118 (Fig.2b).

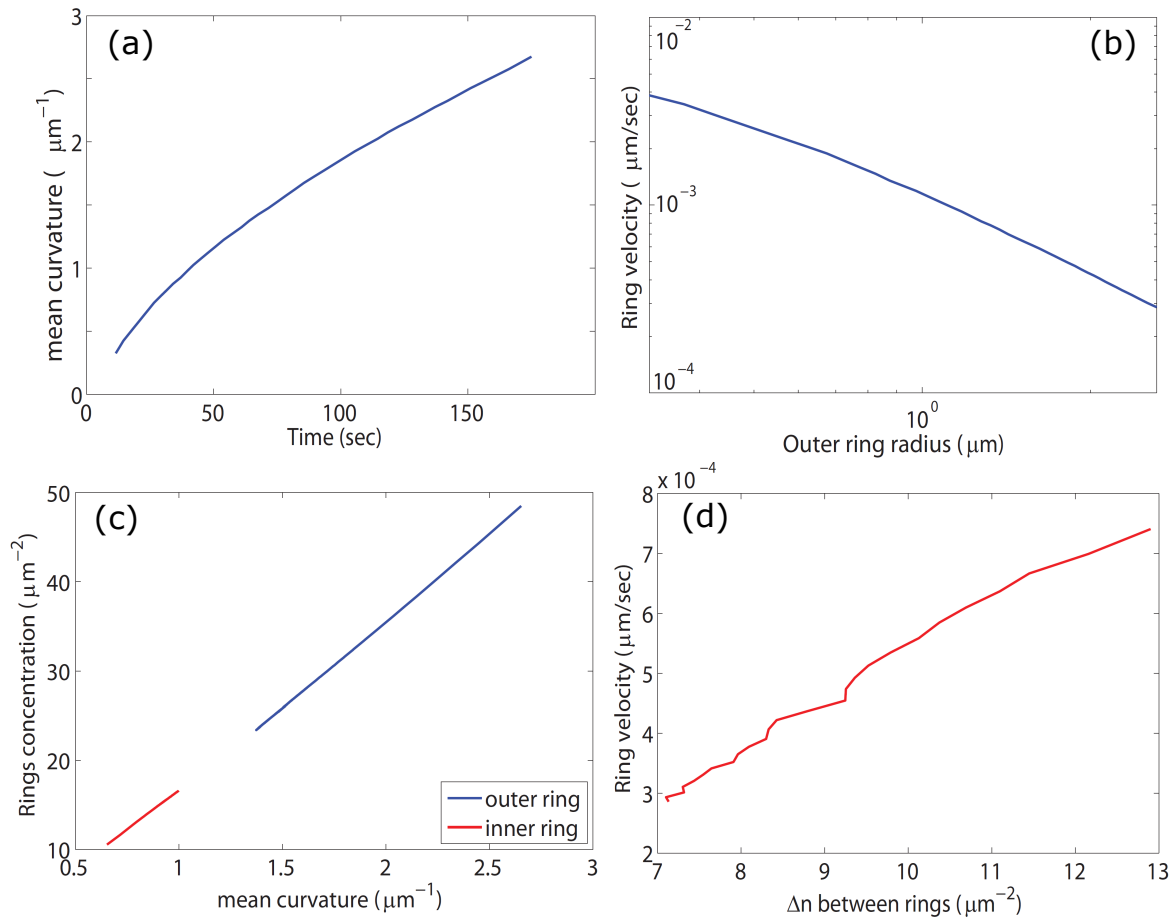

**Figure 2.** (a) The radius of the outer membrane disk (and later ring) as a function of time (all panels correspond to the simulation shown in Fig.1). (b) A log plot of the expansion speed of the outer radius vs the radius. We see that the graph is curved at small radii (where the ring is actually a disk) but as the radius grows (and the ring forms) the graph approaches a straight line indicating the power law relation:  $V_{\text{ring}} \sim 1/R$ . (c) The peak values of the differential concentration  $n-n_0$  at the inner (red) and outer (blue) rings as a function of the local membrane curvature. We see the concentrations are linear in the curvature, as given by Eq.3. (d) The ring outwards velocity as a function of the difference in concentrations between the inner and outer activators ring.

We can quantify these observations by the following calculation: If we hold the membrane shape constant, we can solve the steady state concentration profile of the curved activators that corresponds to that shape. By taking  $\dot{n} = 0$  in Eq.11 and integrating once we get

$$D\nabla n + \frac{\Lambda\kappa\bar{H}^2}{n_s^2}n\nabla n - \frac{\Lambda\kappa\bar{H}}{n_s}n\nabla^3 h = 0 \quad (1)$$

we then divide by  $n$  and integrate again and we are left with

$$D \ln(n/n_0) + \frac{\Lambda\kappa\bar{H}^2}{n_s^2}(n - n_0) - \frac{\Lambda\kappa\bar{H}}{n_s}\nabla^2 h = 0 \quad (2)$$

For large concentrations we can neglect the first term on the left hand side and get

$$n - n_0 = \frac{\bar{H}}{n_s}\nabla^2 h \quad (3)$$

119 We therefore find that when the dynamics of the activators is faster than the expansion rate of the  
120 membrane deformation, so that the activators' concentration is in a quasi steady state, we get that  
121 the activators amplitude is approximately proportional to the local membrane curvature. In Fig.2c  
122 we plot the concentration of the inner and outer rings vs. the mean curvature at these locations. The  
123 plot shows the concentrations are a linear function of the mean curvature which confirms that for the  
124 parameters used in the calculation, the dynamics of the activators is indeed faster than the membrane  
125 dynamics, and the result of Eq.3 is valid.

126 Since in our model the concentration of actin activators is strongly affected by the local membrane  
127 curvature, the dynamics of the ring is sensitive to the topography of the substrate. We illustrate this  
128 by simulating the dynamics on a substrate that is roughened with random bumps with an average  
129 amplitude of a few tens of nanometers (Fig.3a). Using the same set of equations and the same initial  
130 conditions as shown in Fig.1a-d, we now get the result shown in Fig.3b,c. The overall qualitative  
131 behavior is similar to the case with a smooth surface, that is, the formation of an expanding ringlike  
132 membrane structure with inner and outer rings of activators. However, the shape of the expanding  
133 structure is strongly affected by the substrate roughness and did not retain the circular symmetry it  
134 started with. The membrane ring also shows short "finger-like" protrusions extruding radially from the  
135 perimeter, which are accompanied by very strong aggregation of activators. The inner activators ring  
136 does not extend into these deformation. Due to the surface roughness, and the consequent fluctuations  
137 in the membrane curvature, the distribution of the activators inside the membrane ring-like structure  
138 becomes very inhomogeneous and fragmented.

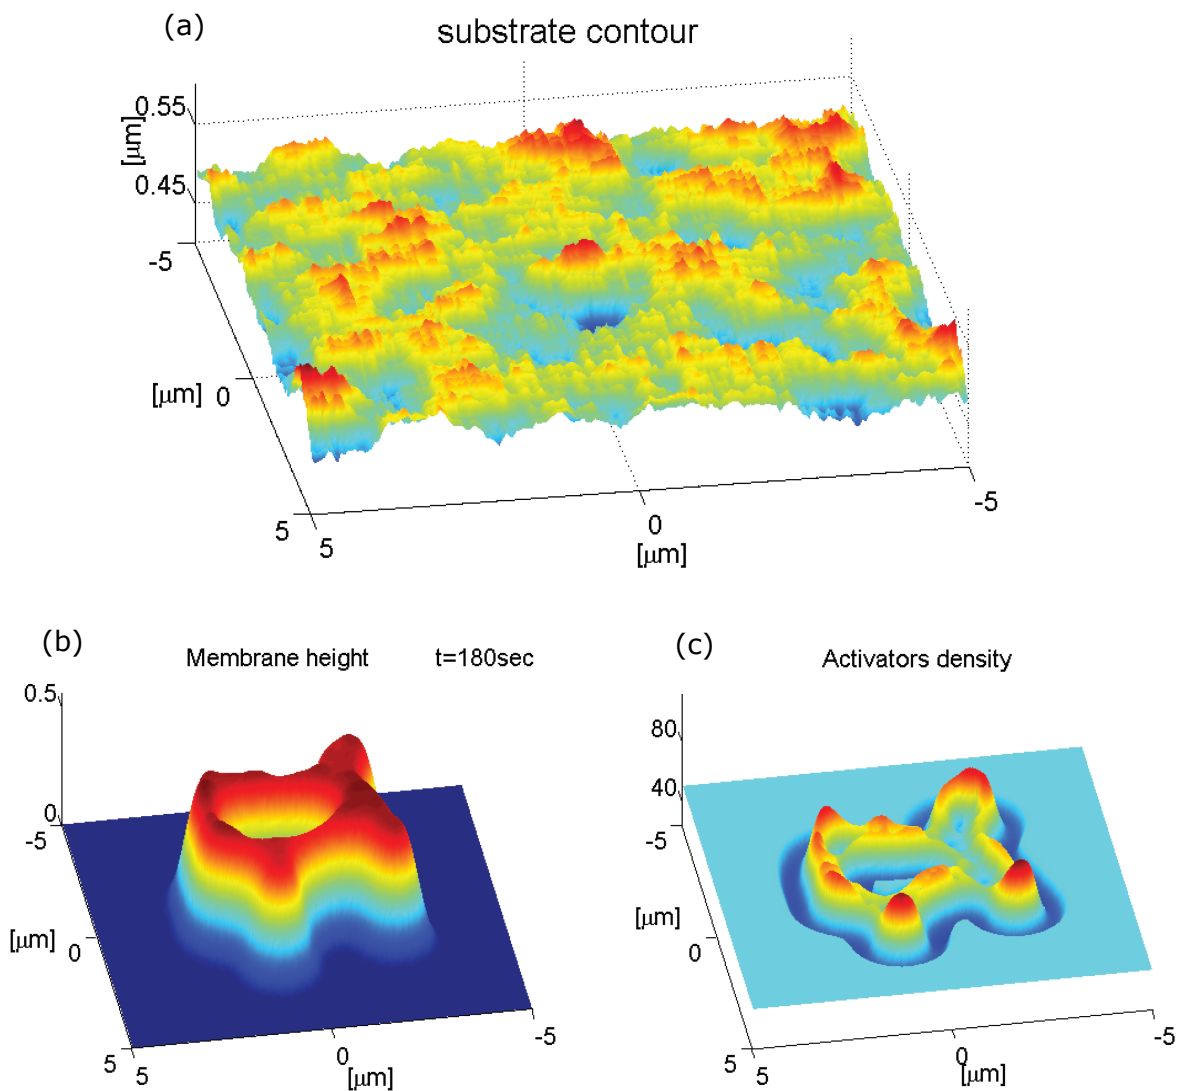

**Figure 3.** (a) Substrate with random roughness, of Gaussian amplitude, with an average amplitude of a few tens of nanometers. (b,c) Numerical integration over a period of 3 minutes of a ring expanding over a membrane segment of size  $10 \times 10 \mu\text{m}^2$ . We used the same parameter values as in Fig.1.

139 Another illustration of the effects of substrate topography is shown in Fig.4 (Supplementary  
140 Movie S2), where a single elongated cylindrical ridge protrudes from the otherwise flat surface (along  
141 the  $x$ -axis). As can be seen, when the membrane ring first reaches the tip of the ridge it is curved  
142 backwards with respect to its expansion direction (top middle panel). As the membrane wraps around  
143 the protruding ridge, this membrane part develops negative curvature and the ring of actin activators  
144 breaks up at that point (top right panel). Only when the inner activators ring forms, this tip of the  
145 bump becomes favorable and concentrates activators that begin to push the membrane ring backwards  
146 towards the point of initiation (bottom right panel). On the two side of the elevated ridge the original  
147 membrane ring propagates faster than on the flat substrate. This is due to the higher concentration of  
148 actin activators, which is caused by the high positive curvature in the sharp corners that the elevated  
149 ridge makes with the flat substrate (bottom middle and right panels).



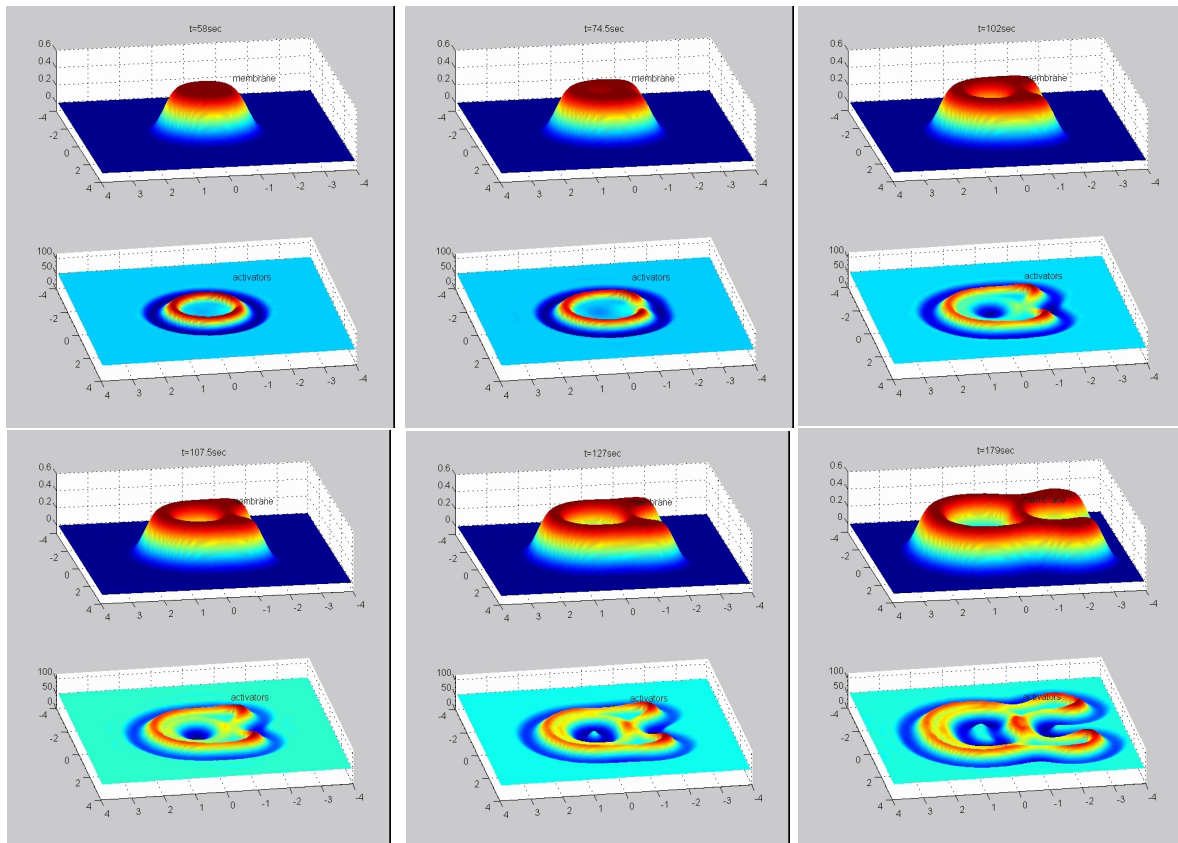

**Figure 4.** Numerical integration of a ring expanding over a membrane that contains a cylindrical ridge along the  $x$ -axis. From top-left to bottom-right, each panel shows the system at increasing time, with the membrane shape and activator density in the top and bottom parts respectively. We used the same parameter values as in Fig.1.

150 The simulations in Figs.3,4, demonstrate that the distribution of actin activators (and therefore  
151 actin filaments) can become highly fragmented due to surface undulations, while the enveloping  
152 membrane structure remains continuous and smooth. It is therefore not straightforward to relate the  
153 actin signal to the membrane topography when interpreting experimental images of such cell-substrate  
154 waves. It also shows that topographic features can cause local direction reversals and break-up of  
155 these actin waves.

## 156 2.2. Array of localized protrusions

157 We now study the conditions that may stabilize localized structures driven by the same curved  
158 activator we used so far. In Fig.5 we show that starting with different initial conditions may lead to a  
159 quasi-stable array of localized structures. A random noise in the initial membrane height or activators  
160 density, instead of a single perturbation, gives rise to multiple protrusions, each with a lateral size  
161 comparable to  $\lambda_c$  (Fig.5). When these protrusions reach the substrate they undergo the same process  
162 of flattening and expanding that we saw before for a single protrusion. During their expansion, the  
163 distance between these protrusion naturally decreases. The interaction between these protrusion is  
164 repulsive due to the positive membrane curvature region trapped between neighboring protrusions,  
165 similar to those observed in other curved membrane-bound aggregates [26]. Therefore once they  
166 have expanded and reached a distance of order  $\lambda_c$  from each other their expansion is halted and they  
167 stabilize. Over the course of the stabilization, the protrusions expand into all the space that is available  
168 by the repulsive interactions between neighbors, leading to the elongation of some of the protrusions.  
169 Furthermore, if two protrusions were initially formed in close proximity, the energy barrier between

170 them is decreased and they can coalesce into a single elongated protrusion (arrows in Fig.5b,c,d point  
171 to such a process).

172 Note that in these localized protrusions the actin forms small rings within each protrusion, due to  
173 the same process we found in the expanding ring (Fig.1), on a smaller scale. These protrusions, which  
174 may seem stable, are highly sensitive to small perturbations, since they are stabilized only by their  
175 mutual repulsion due to the local membrane-driven barrier. Over long times we expect noise to cause  
176 them to shift and coalesce. Non-linear terms drive coalescence over such barriers, over long time [26].

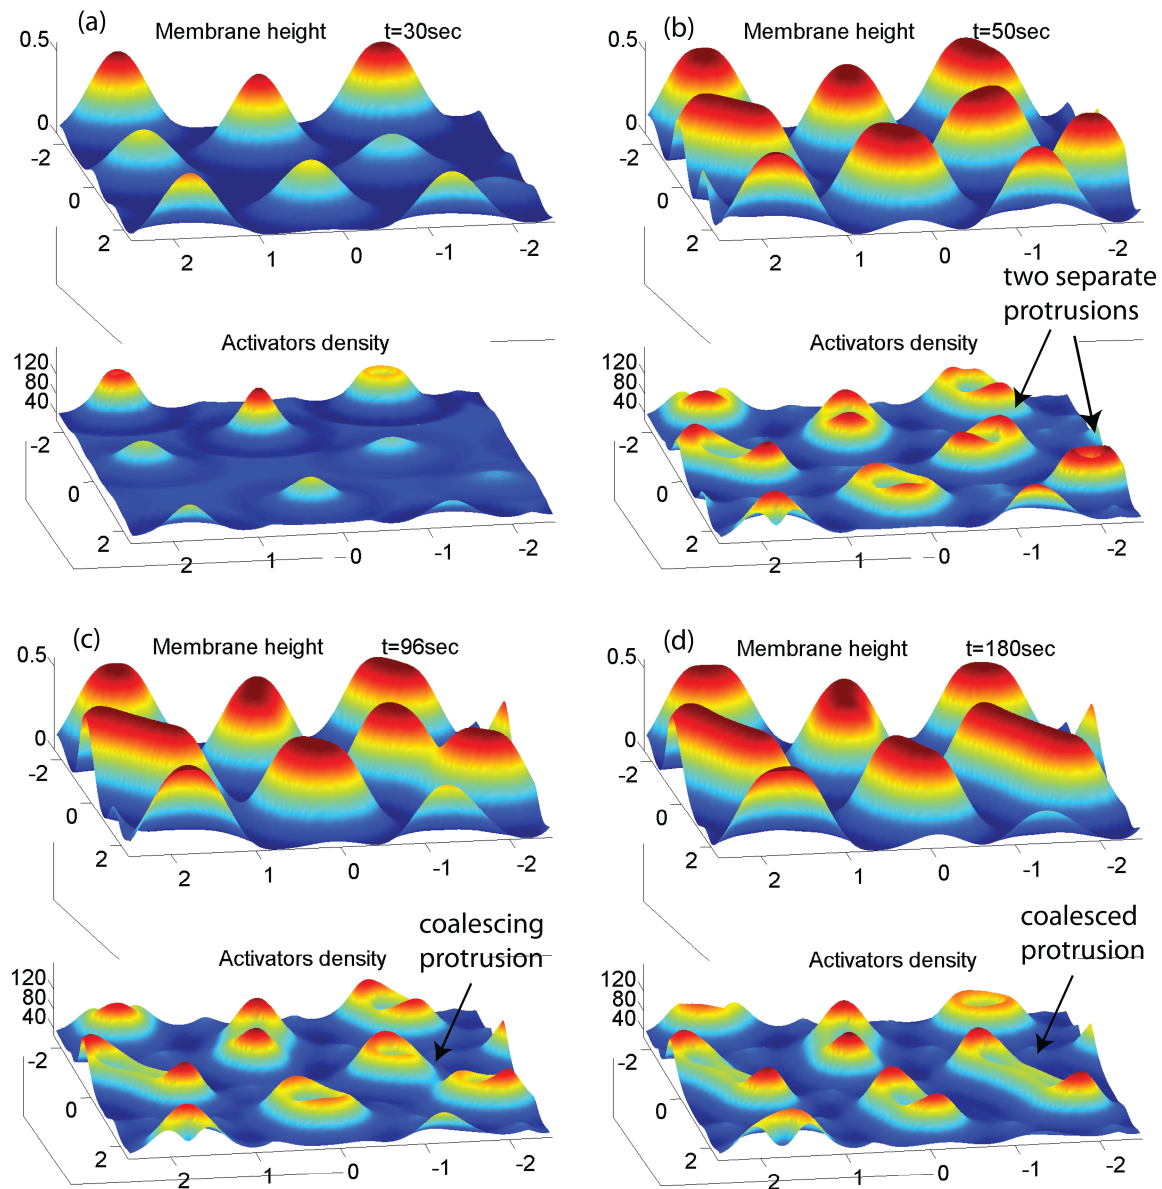

**Figure 5.** Simulation over a period of 3 minutes over a membrane segment of size  $5 \times 5 \mu\text{m}^2$ , with Gaussian noise in the initial membrane height with variance of 10nm. The membrane's random initial deformations develop into protrusions of lateral size  $\sim \lambda_c$ . (a) The initial growth period before most of them make contact with the substrate. (b)-(c) The stabilization period of the protrusions, which elongate into the available space and may coalesce with very proximal protrusions. (d) The final steady state of the system. We used the same parameter values as in Fig.1.

177 2.3. Adhesion-stabilized localized protrusion: the podosome

178 In order to stabilize an isolated protrusion on the basal side, using the curvature-actin mechanism  
179 that we propose, we need to stabilize the localized actin core and prevent the tendency of the protrusion  
180 to expand outwards as a ring (Fig.1). An example of a localized adhesion structure on the basal size  
181 of many cell types is the podosome [27]. Podosomes are actin-rich protrusive adhesion structures  
182 formed on the membrane of several cell types, and have been implicated in the processes of cell  
183 migration, tissue invasion and extracellular matrix (ECM) degradation. The mechanisms that give rise  
184 to podosome formation, and their large-scale organization in the cell, are still poorly understood and  
185 are the subject of ongoing current research [28]. Podosomes are typically formed in monocytic cells  
186 such as macrophages, osteoclasts and dendritic cells and similar structures called invadopodia have  
187 been observed in carcinoma cells [29,30,31,32,33]. They are relatively dynamic, formed and destroyed  
188 in the span of a few minutes and are formed only on the interface between the cell and a substrate.

189 The podosome's actin core is surrounded by an adhesion ring, which we did not include so far  
190 in the theoretical model, and we therefore suggest that this component may stabilize the core and  
191 prevent its ring-like expansion. We propose that the adhesion molecules form a diffusion-barrier that  
192 greatly inhibits the diffusion of the membrane-bound actin nucleators (Eq.14), and thereby stabilizes  
193 the localized core. We incorporate the adhesion into the model with the same approach that we  
194 used to incorporate the actin, namely, all the proteins involved in the adhesion process, from plaque  
195 proteins that form a scaffold around the actin core to the integrins which connect between the cellular  
196 membrane and external ligands, are grouped into a single component which we denote the "adhesion  
197 proteins". We consider adhesion proteins to be membrane proteins that have two possible states:  
198 a non-adhered, freely diffusing state with concentration  $g_f$  and an adhered, immobile state with  
199 concentration  $g_b$ . The transition from non-adhered to adhered state is only possible when the distance  
200 between the membrane and the substrate is small enough, for the membrane-bound integrins to bind  
201 to the substrate. Note that we do not explicitly describe the inter-podosome actin network [32], but  
202 rather focus on modeling a single, isolated podosome.

203 In addition to the geometric constraint, the binding rate of the membrane-bound adhesion proteins  
204 depends on the application of tensile forces, as integrins are known to exhibit catch-bond properties  
205 [34,35]. In the vicinity of the actin core of the podosome, the tensile force is thought to arise at the  
206 outer edge of the core, where the actin filaments flow towards the actin core and apply a pulling and  
207 shearing force that facilitates integrin adhesion [36,37,38] (Fig. 6a).

208 We combine the two properties that affect the adhesion listed above, in a very simplified way, in  
209 the following equations for the binding/unbinding rates of the adhesion proteins (used in the first  
210 order kinetics Eqs.15)

$$k_{on}^s = k_{on,0}^s f(h) |\nabla n| \quad (4)$$

$$k_{off}^s = k_{off,0}^s \quad (5)$$

211 where  $f(h)$  has the profile shown in Fig.6b so that binding is only permitted close to the substrate. The  
212 last term in Eq.4 describes in the simplest way the fact that the adhesion is dependent on the spatial  
213 gradients in the actin force that is applied on the membrane. In addition, we note that the adhesion  
214 strength that determines  $k_{on,0}^s/k_{off,0}^s$  is affected by the substrate stiffness and chemical composition.

215 As before (Fig.1), we investigate the system's behavior due to a small gaussian perturbation in  
216 the membrane height (Fig. 7). Numerical integration of Eqs.15 shows that the perturbation grows into  
217 a protrusion and the curved activators aggregate at the tip of the protrusion. When the protrusion  
218 reaches the substrate, the activators disperse from the center towards the shoulders. However, at the  
219 same stage, adhesion proteins bind to the substrate around the activators and inhibit their dispersion.  
220 If the adhesion proteins aggregate quickly enough they can trap the activators in the protrusion core,  
221 despite the negligible curvature that the membrane at the center poses due to the confinement by  
222 the flat substrate. However, the activators in the core may still form a small ring due to small changes

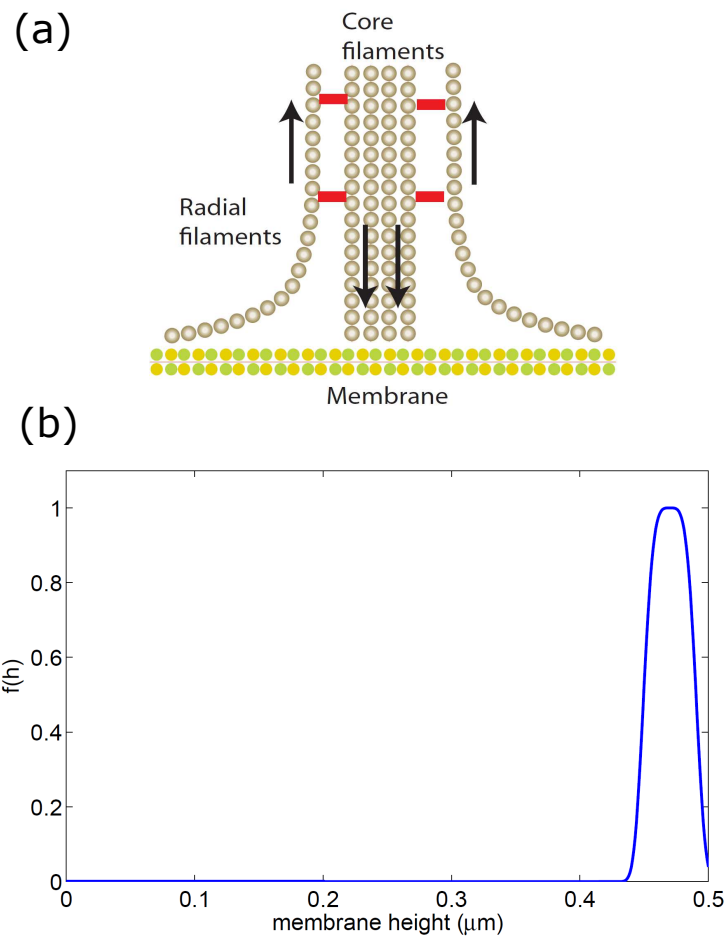

**Figure 6.** (a) Schematic illustration of the actin cables around the core of the podosome, where the treadmilling flow induces shearing and pulling forces near the membrane. These forces are thought to activate integrin-based cell adhesion [28]. (b) The function  $f(h)$  (Eq.4) that we used to limit the binding of the adhesion proteins only to within a distance of  $2l_0$  from the substrate (here  $h_{\text{wall}} = 0.5\mu\text{m}$ ).

223 in membrane curvature (Fig. 7). When we choose a shorter binding protein, we get a core of smaller  
224 radius, which is uniform, i.e. the activators do not form a ring shape. We therefore demonstrate that  
225 the adhesion-ring can indeed function as a diffusion-barrier that stabilizes the actin core. On long-time  
226 scales, where the membrane-bound actin nucleators may detach from the membrane, the actin core  
227 may decay and this process could limit the podosome life-time.

228 Overall, the stable podosome-like structure that our model produces exhibits many properties of  
229 the podosome. This serves to demonstrate that a model with very few components can give rise to  
230 spontaneous formation of membrane protrusions at the basal side of cells, which form an adhesion  
231 complex that closely resembles podosomes. It is sometimes observed that the actin core of podosomes  
232 may be slightly depleted at its center near the membrane [39], which is a feature that can also appear  
233 in our model (Fig.7).

234 Note that our model contains a single type of curved actin "activator", while podosomes seem to  
235 possess a complex composition of actin filaments [40], as well as a complex and dynamic inter-podosome  
236 actin-myosin network [41]. Future modeling of these cellular structures, could involve more of these  
237 components, allowing for the simulation of their large-scale dynamics, where podosomes form macro  
238 structures comprised of many podosomes [38,42]. For such long-time simulations we will also need  
239 to include processes that limit the life-time of individual podosomes. In most cells, podosomes are  
240 organized in a cluster of uniform distribution with a characteristic distance between, undergoing

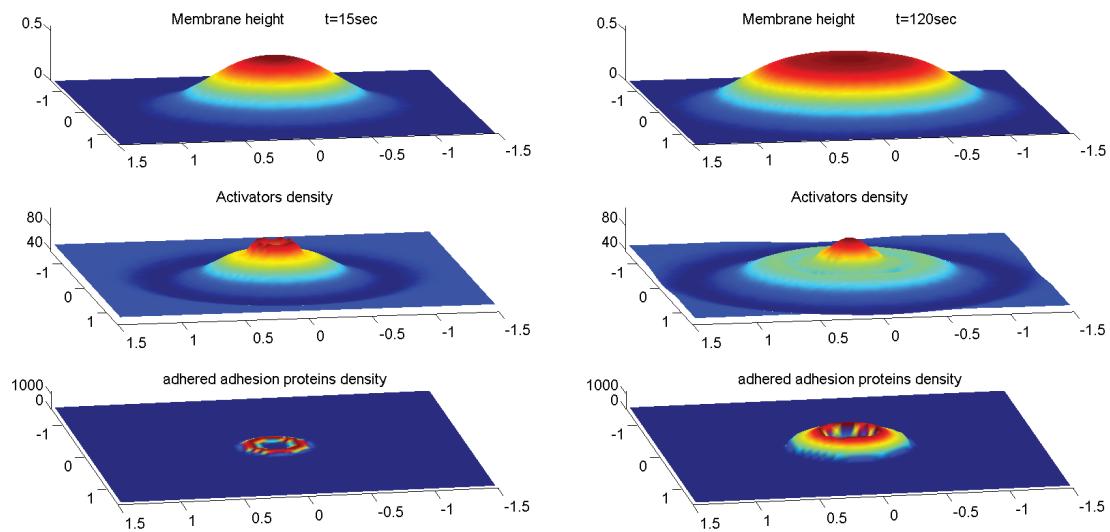

**Figure 7.** Numerical integration of equations (15) for the case of constitutive active activators over a period of 2 minutes over a membrane segment of size  $5 \times 5 \mu\text{m}^2$ . The parameter values used were the same as used previously, with the following changes:  $A = 1.9 \cdot 10^{-5} \text{kg} \cdot \mu\text{m}^5 \cdot \text{sec}^{-2}$ ,  $D_g = 0.1 \mu\text{m}^2 / \text{sec}$ ,  $k_{on,0}^g = 0.05 \mu\text{m}^5 / \text{sec}$ ,  $k_{off,0}^g = 1 \mu\text{m}^2 / \text{sec}$ ,  $l_0 = 0.04 \mu\text{m}$  and  $g_0 = 50 \mu\text{m}^{-2}$  (the initial uniform concentration of the free adhesion proteins). The perturbation develops into a protrusion and when it reaches the wall the activators at the core start expanding into a ring but this expansion is inhibited by the adhesion ring that forms around it. The actin core is then trapped by the adhesion ring and the structure stabilizes.

241 processes of fusion and fission [43]. This organization and dynamics qualitatively resembles the  
 242 dynamics shown in Section 2.2 (Fig.5).

243 In several cell types, such as osteoclasts, large collections of podosomes exhibit a transition to  
 244 an expanding multi-podosome ring structure. The ring is densely populated with podosomes, has a  
 245 width of a few podosomes and expands at a speed of  $\sim 1 - 2 \mu\text{m} / \text{min}$  [44,45]. The podosomes in the  
 246 multi-podosome ring are immobile and the ring's outward expansion is achieved by a treadmilling  
 247 manner: the podosomes decay at the inner part of the multi-podosome ring and form preferentially at  
 248 its outer edge [43]. These multi-podosome rings move outward and merge with each other until they  
 249 reach the cell periphery, where they may stabilize as a podosome belt ("sealing zone") [46]. In certain  
 250 cells the rings seem to originate at the same locations at roughly regular intervals [45].

251 Within the current model we can not account for the detailed dynamics of the podosomes within  
 252 the expanding ring, but we can speculate that its outwards expansion may be related to the mechanism  
 253 that drives the expansion of the actin ring described in Section 2.1: When a podosome in the ring  
 254 decays, its constituent proteins diffuse away, and due to the ring-link deformation of the membrane  
 255 the curved proteins tend to aggregate more strongly at the outer edge of the ring compared to its inner  
 256 edge (see Fig.1). This mechanism will therefore naturally increase the rate of podosome formatino on  
 257 the outer edge of the ring, compared to its inner edge, and over time cause the outwards expansion of  
 258 the podosome ring. This expansion will depend on the rate of podosome initiation and decay, that  
 259 enables this effective "podosome treadmill".

### 260 3. Discussion

261 The results of our model can give a very natural explanation to several puzzling features observed  
 262 in experiments. One such feature is that actin waves at the cell-substrate interface are observed to  
 263 expand as a single ring of actin polymerization, but beyond a certain size an inner ring of actin that

264 follows the outer one appears. The inner ring is often weaker than the outer ring, as our model predicts.  
265 This feature was first noted by Vicker [24] in *Dictyostelium discoideum* amoebae, and more recently this  
266 feature was studied in great detail [8,25].

267 The actin fronts observed in these experiments are very often broken and fragmented, with  
268 numerous breaks appearing along the ring [24,25]. This feature is a natural consequence in our model  
269 of the sensitivity of the actin concentration to the surface topography (Figs.3,4), due to the curvature  
270 sensitivity of the actin nucleators. Our model further predicts that the actin polymerization will tend to  
271 concentrate where the substrate has concave corners, as along the sides of elevated ridges (Fig.4). This  
272 prediction is in agreement with observations of crawling *Dicty* on surfaces with patterned ridges [47].

273 To conclude, we have shown some aspects of the dynamics of the actin-membrane system, when  
274 driven by convex actin activators and confined by the substrate. We show that the confinement  
275 itself provides a source of negative feedback that can drive propagating fronts. These simulations  
276 are simplified and contain several assumptions, which may not apply to all the biological cases.  
277 Furthermore, we do not claim that the actin waves along the basal membranes of cells are driven solely  
278 by the mechanism that we describe. Clearly complex reaction-diffusion feedbacks play an important  
279 role in the propagation of actin waves in cells [3,8,24,25,48,49,50]. Our work may motivate further  
280 studies of models that include both the reaction-diffusion dynamics and the membrane shape, coupled  
281 by curved membrane complexes that nucleate actin polymerization [14]. Since reaction diffusion  
282 models lead to rich dynamics, as does the curvature-actin coupling [18], we expect that models with  
283 both features could open up new classes of cell membrane dynamics to explore.

284 Regarding localized structures at the basal membrane, our model predicts that these may be  
285 stabilized by the formation of adhesion around the actin-core, as observed in podosomes. Furthermore,  
286 if the membrane can be maintained in a curved shape at the tip of the protrusion (rather than flatten),  
287 we predict that the curved activators will be less strongly dispersed (if at all), and the lifetime of the  
288 localized protrusion extended. This prediction is in agreement with observations that podosomes  
289 preferentially form along grooves where the membrane naturally has the curvature at the protrusion  
290 tip [51,52]. When the protrusion is able to penetrate into the substrate, as occurs in invadopodia [53],  
291 the curvature at the protrusion tip is also maintained and this can stabilize the protrusion.

## 292 4. Materials and Methods

### 293 4.1. Model without membrane-substrate adhesion

294 The model has two variables,  $h(\vec{r}, t)$ ,  $n(\vec{r}, t)$ , that describe the local height deformation of the  
295 membrane from its uniform state, and the local density of the membrane-bound, and curved, activators  
296 of actin polymerization, respectively. We will work in the limit of small membrane deformations,  
297 which allow us to treat the elastic energy of the membrane due to tension and bending in the quadratic  
298 limit [15,16]. This is an approximation which may be justified due to the presence of the confining  
299 boundary that naturally limited the amplitude of the membrane deformations. Non-linear effects  
300 arise in our calculations only from the conservation of the activator field  $n$ . For simplicity we do not  
301 consider the process of binding and unbinding of the actin activators from the membrane, which can  
302 be added in the future [10].

303 We start with the free energy of the membrane and actin activators [15,16]

$$F(h, n) = \int d^2r \left[ \frac{1}{2} \kappa \left( \nabla^2 h - \bar{H} \frac{n}{n_s} \right)^2 + \frac{1}{2} \sigma (\nabla h)^2 + k_B T n \ln(n) \right] \quad (6)$$

304 where  $\sigma$  is the effective membrane tension,  $\kappa$  the bending modulus,  $\bar{H}$  the spontaneous curvature of  
305 the actin activators and  $n_s$  their saturation density. In this treatment the two dimensional Laplacian  
306  $\nabla^2 h$  is the local mean membrane curvature, and we keep the entropic term only at the lowest order,  
307 valid for low protein densities  $n \ll n_s$ .

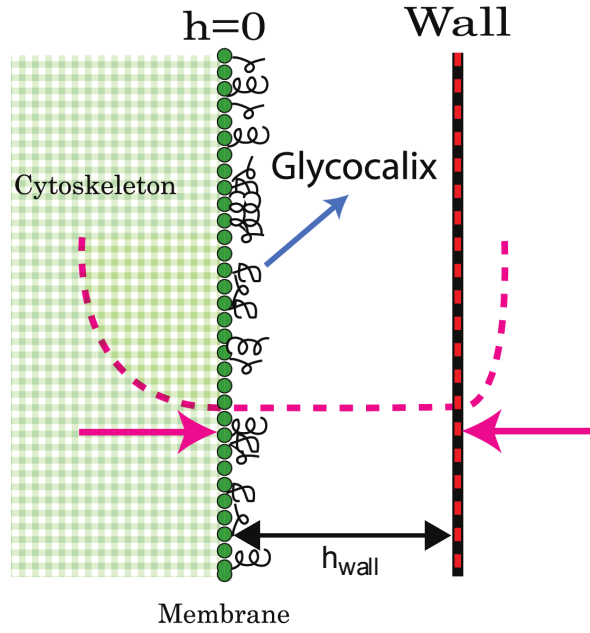

**Figure 8.** Illustration of the model. The substrate ("wall") acts as a spring with a force  $F_{\text{wall}}(h - h_{\text{wall}})$  (right pink arrow) when the membrane height  $h$  exceeds the boundary location  $h_{\text{wall}}$ . The cytoskeleton acts in the same way only in the opposite direction (left pink arrow) and is typically softer, i.e.  $F_{\text{cyt}} < F_{\text{wall}}$ .

We model the external barrier (substrate) as a one sided harmonic potential (Fig.8) that affects the membrane if its height coordinate  $h$  exceeds the barrier height coordinate  $h_{\text{wall}}$ . We also subject the membrane to a similar force (though smaller in magnitude) if its height is lower than the initial height (at  $h = 0$ ) to account for the overall average rigidity of the cortical cytoskeleton. The wall and cytoskeleton interactions can be inserted as potentials to the free energy of the system, in the form

$$V_{\text{wall}} = \begin{cases} \frac{1}{2}F_{\text{wall}}(h - h_{\text{wall}})^2 & h > h_{\text{wall}} \\ 0 & h \leq h_{\text{wall}} \end{cases} \quad (7)$$

$$V_{\text{cyt}} = \begin{cases} \frac{1}{2}F_{\text{cyt}}h^2 & h < 0 \\ 0 & h \geq 0 \end{cases} \quad (8)$$

308 where  $F_{\text{wall}}, F_{\text{cyt}}$  determine the stiffness of these potentials.

The equation of motion for the membrane height is given by [15,54]

$$\dot{h} = - \int \Gamma(r - r') \frac{\delta F}{\delta h} d^2r \quad (9)$$

where  $\Gamma(r - r')$  is the Oseen tensor for the hydrodynamic interactions through the surrounding fluid. We replace this long-range interaction kernel with a local one, as is often used for membranes that are highly confined by the cytoskeleton (and here also by the substrate) [15,16]. We therefore take:  $\Gamma(r - r') = \mu\delta(r - r')$ , where  $\mu$  is the drag coefficient of the membrane. We can now use Eqs.6,9 to write the equation of motion for the membrane height

$$\dot{h} = \mu \left[ -\kappa\nabla^4 h + \frac{\kappa\bar{H}}{n_s}\nabla^2 n + \sigma\nabla^2 h + A(n - n_0) - F_{\text{wall}}(h - h_{\text{wall}})\theta[h - h_{\text{wall}}] - (1 - \theta[h])F_{\text{cyt}}h \right] \quad (10)$$

309 where we used the step function  $\theta[h]$  to implement the truncated forces of the confining potentials  
310 of Eqs.7 and 8. The fourth term on the r.h.s. denotes the force due to actin polymerization, which is

311 proportional to the density of actin activators with proportionality factor  $A$ . We subtract the average  
 312 density of the actin cortex in this term to denote the fact that the cell membrane tends to be pushed  
 313 away from the substrate by a layer of extracellular molecules (called the glycocalix) [55,56]. These  
 314 molecules act as molecular cushions and maintain weak (non-specific) cell-substrate adhesion, and  
 315 maintain osmotic pressure on the cell membrane.

The dynamics of the actin activators is given by [15,16]

$$\dot{n} = \Lambda \nabla \cdot \left( n \nabla \left( \frac{\delta F}{\delta h} \right) \right) = D \nabla^2 n + \frac{\Lambda \kappa \bar{H}^2}{n_s^2} \nabla \cdot (n \nabla n) - \frac{\Lambda \kappa \bar{H}}{n_s} \nabla \cdot (n \nabla^3 h) \quad (11)$$

316 where  $\Lambda$  is the mobility of the activators in the membrane, and  $D = \Lambda k_B T$  is their diffusion coefficient.

317 We note that the model presented here considers activators that are permanently bound to the  
 318 membrane and respond to the curvature by flowing in the membrane. Alternatively, the activators can  
 319 be considered to adsorb to the membrane from the cytoplasm in a curvature-dependent manner [10].

Linear stability analysis of these equations of motion (Eqs.10,11) indicate that the system is unstable to small perturbations in either the membrane shape or activators density, for a range of parameters. For negligible membrane tension the most unstable wavelength is

$$\lambda_c \simeq 2\pi \sqrt{\frac{k_B T \mu}{A \bar{H} n_s}} \quad (12)$$

320 We chose the parameters to have this wavelength of order  $1 \mu\text{m}$ .

321 The numerical simulations were done using an explicit finite difference scheme centered in space  
 322 and forward in time, with periodic boundary conditions. The cartesian grid used in the simulations  
 323 was  $0.025 \times 0.025 \mu\text{m}$  in size.

#### 324 4.2. Model with membrane-substrate adhesion

325 When including adhesion proteins, the free energy of the system becomes

$$F(n, h) = \int dx dy \left[ \frac{1}{2} \kappa \left( \nabla^2 h - \frac{\bar{H}}{n_s} n \right)^2 + \frac{1}{2} \sigma (\nabla h)^2 + g_b \theta(h - h_g) \frac{1}{2} k_d (h - h_{\text{wall}} - l_0)^2 + \right. \\ \left. k_B T \left( n \ln(n) + g_f \ln(g_f) \right) \right] \quad (13)$$

326 where where  $l_0$  is the length of the external part of the adhesion protein and  $h_g$  is the minimal  
 327 membrane height required for adhesion to take place. We take this value to be  $h_g \simeq h_{\text{wall}} - 2l_0$  to allow  
 328 for variations in the proteins length or membrane fluctuations.

In addition we assume that the mobility of the actin activators to decrease in regions that have high concentration of adhered adhesion proteins. The reasoning behind this is that the scaffold of plaque proteins surrounds the actin core and restricts the movement of actin filaments, and forms a "diffusion-barrier". If actin activators are attached to actin filaments then they too will be restricted. We therefore take the mobility to decrease with the local density of bound adhesion proteins, as follows

$$\Lambda = \begin{cases} \Lambda_0 - \frac{g_b}{g_{\text{max}}}, & \text{for } g_b \leq g_{\text{max}} \\ 0, & \text{for } g_b > g_{\text{max}} \end{cases} \quad (14)$$



Under these conditions we can write the following equations of motion, including the dynamics of the free and bound adhesion proteins ( $g_f, g_b$  respectively)

$$\dot{h} = -\mu \left( \kappa \nabla^4 h + \frac{\kappa \bar{H}}{n_s} \nabla^2 n + \mu \sigma \nabla^2 h + A(n - n_0) - \theta(h - h_g) g_b k_d (h - h_{wall} - l_0) - \right. \quad (15a)$$

$$\left. \theta(h - h_{wall}) F_{wall}(h - h_{wall}) - (1 - \theta(h)) F_{cyt} h \right) \quad (15b)$$

$$\dot{n} = D \nabla^2 n + \frac{\Lambda \kappa \bar{H}^2}{n_s^2} \nabla(n \nabla n) - \frac{\Lambda \kappa \bar{H}}{n_s} \nabla(n \nabla^3 h) \quad (15c)$$

$$\dot{g}_b = \theta(h - h_g) k_{on}^g g_f - k_{off}^g g_b \quad (15d)$$

$$\dot{g}_f = D_g \nabla^2 n_f - \theta(h - h_g) k_{on}^g g_f + k_{off}^g g_b \quad (15e)$$

329 Where  $D_g$  is the diffusion coefficient of the free (un-adhered) adhesion proteins in the membrane,  
330 and the binding/unbinding rates of the adhesion proteins is given in Eqs.4,5.

331 **Author Contributions:** Conceptualization, M.N. and N.S.G.; numerical simulations, M.N.; writing, M.N. and  
332 N.S.G.

333 **Funding:** This research was funded by NAME OF FUNDER grant number XXX." [https://search.crossref.org/](https://search.crossref.org/funding)  
334 [funding](https://search.crossref.org/funding), any errors may affect your future funding.

335 **Acknowledgments:** N.S.G is the incumbent of the Lee and William Abramowitz Professorial Chair of Biophysics.  
336 This work is made possible through the historic generosity of the Perlman family.

337 **Conflicts of Interest:** The authors declare no conflict of interest. The funders had no role in the design of the  
338 study; in the collection, analyses, or interpretation of data; in the writing of the manuscript, or in the decision to  
339 publish the results.

## 340 References

- 341 [1] Gerisch, G.; Bretschneider, T.; Müller-Taubenberger, A.; Simmeth, E.; Ecke, M.; Diez, S.; Anderson, K.  
342 Mobile actin clusters and traveling waves in cells recovering from actin depolymerization. *Biophysical*  
343 *journal* **2004**, *87*, 3493–3503.
- 344 [2] Bretschneider, T.; Diez, S.; Anderson, K.; Heuser, J.; Clarke, M.; Müller-Taubenberger, A.; Köhler, J.; Gerisch,  
345 G. Dynamic actin patterns and Arp2/3 assembly at the substrate-attached surface of motile cells. *Current*  
346 *Biology* **2004**, *14*, 1–10.
- 347 [3] Allard, J.; Mogilner, A. Traveling waves in actin dynamics and cell motility. *Current opinion in cell biology*  
348 **2013**, *25*, 107–115.
- 349 [4] Inagaki, N.; Katsuno, H. Actin waves: Origin of cell polarization and migration? *Trends in cell biology* **2017**,  
350 *27*, 515–526.
- 351 [5] Bretschneider, T.; Anderson, K.; Ecke, M.; Müller-Taubenberger, A.; Schroth-Diez, B.; Ishikawa-Ankerhold,  
352 H.C.; Gerisch, G. The three-dimensional dynamics of actin waves, a model of cytoskeletal self-organization.  
353 *Biophysical journal* **2009**, *96*, 2888–2900.
- 354 [6] Schroth-Diez, B.; Gerwig, S.; Ecke, M.; Hegerl, R.; Diez, S.; Gerisch, G. Propagating waves separate two  
355 states of actin organization in living cells. *HFSP journal* **2009**, *3*, 412–427.
- 356 [7] Gerisch, G. Self-organizing actin waves that simulate phagocytic cup structures. *PMC biophysics* **2010**, *3*, 7.
- 357 [8] Miao, Y.; Bhattacharya, S.; Banerjee, T.; Abubaker-Sharif, B.; Long, Y.; Inoue, T.; Iglesias, P.A.; Devreotes,  
358 P.N. Wave patterns organize cellular protrusions and control cortical dynamics. *Molecular systems biology*  
359 **2019**, *15*.
- 360 [9] Shlomovitz, R.; Gov, N.S. Membrane waves driven by actin and myosin. *Phys. Rev. Lett.* **2007**, *98*, 168103.
- 361 [10] Peleg, B.; Disanza, A.; Scita, G.; Gov, N. Propagating cell-membrane waves driven by curved activators of  
362 actin polymerization. *PLoS One* **2011**, *6*, e18635.
- 363 [11] Mattila, P.K.; Pykäläinen, A.; Saarikangas, J.; Paavilainen, V.O.; Vihinen, H.; Jokitalo, E.; Lappalainen,  
364 P. Missing-in-metastasis and IRSp53 deform PI(4,5)P2-rich membranes by an inverse BAR domain-like  
365 mechanism. *J. Cell Biol.* **2007**, *176*, 953–64.

- 366 [12] Scita, G.; Confalonieri, S.; Lappalainen, P.; Suetsugu, S. IRSp53: crossing the road of membrane and actin  
367 dynamics in the formation of membrane protrusions. *Trends in Cell Biol.* **2008**, *18*, 52–60.
- 368 [13] Kovacs, E.M.; Makar, R.S.; Gertler, F.B. Tuba stimulates intracellular N-WASP-dependent actin assembly. *J.*  
369 *Cell Sci.* **2006**, *119*, 2715–26.
- 370 [14] Wu, Z.; Su, M.; Tong, C.; Wu, M.; Liu, J. Membrane shape-mediated wave propagation of cortical protein  
371 dynamics. *Nature communications* **2018**, *9*, 136.
- 372 [15] Gov, N.S.; Gopinathan, A. Dynamics of membranes driven by actin polymerization. *Biophysical journal*  
373 **2006**, *90*, 454–69.
- 374 [16] Veksler, A.; Gov, N.S. Phase transitions of the coupled membrane-cytoskeleton modify cellular shape.  
375 *Biophysical journal* **2007**, *93*, 3798–810.
- 376 [17] Kabaso, D.; Shlomovitz, R.; Schloen, K.; Stradal, T.; Gov, N.S. Theoretical model for cellular shapes driven  
377 by protrusive and adhesive forces. *PLoS Comput Biol* **2011**, *7*, e1001127.
- 378 [18] Gov, N. Guided by curvature: shaping cells by coupling curved membrane proteins and cytoskeletal forces.  
379 *Philosophical Transactions of the Royal Society B: Biological Sciences* **2018**, *373*, 20170115.
- 380 [19] Fosnarić, M.; Penić, S.; Iglić, A.; Kralj-Iglic, V.; Drab, M.; Gov, N. Theoretical study of vesicle shapes driven  
381 by coupling curved proteins and active cytoskeletal forces. *Soft Matter* **2019**.
- 382 [20] Yang, C.; Hoelzle, M.; Disanza, A.; Scita, G.; Svitkina, T. Coordination of membrane and actin cytoskeleton  
383 dynamics during filopodia protrusion. *PLoS one* **2009**, *4*, e5678.
- 384 [21] Vaggi, F.; Disanza, A.; Milanese, F.; Di Fiore, P.P.; Menna, E.; Matteoli, M.; Gov, N.S.; Scita, G.; Ciliberto, A.  
385 The Eps8/IRSp53/VASP network differentially controls actin capping and bundling in filopodia formation.  
386 *PLoS Comput Biol* **2011**, *7*, e1002088.
- 387 [22] Prévost, C.; Zhao, H.; Manzi, J.; Lemichez, E.; Lappalainen, P.; Callan-Jones, A.; Bassereau, P. IRSp53 senses  
388 negative membrane curvature and phase separates along membrane tubules. *Nature communications* **2015**,  
389 *6*.
- 390 [23] Begemann, I.; Saha, T.; Lamparter, L.; Rathmann, I.; Grill, D.; Golbach, L.; Rasch, C.; Keller, U.; Trappmann,  
391 B.; Matis, M.; others. Mechanochemical self-organization determines search pattern in migratory cells.  
392 *Nature Physics* **2019**, p. 1.
- 393 [24] Vicker, M.G. F-actin assembly in Dictyostelium cell locomotion and shape oscillations propagates as a  
394 self-organized reaction–diffusion wave. *FEBS letters* **2002**, *510*, 5–9.
- 395 [25] Gerhardt, M.; Ecke, M.; Walz, M.; Stengl, A.; Beta, C.; Gerisch, G. Actin and PIP3 waves in giant cells reveal  
396 the inherent length scale of an excited state. *J Cell Sci* **2014**, *127*, 4507–4517.
- 397 [26] Shlomovitz, R.; Gov, N. Membrane-mediated interactions drive the condensation and coalescence of FtsZ  
398 rings. *Physical biology* **2009**, *6*, 046017.
- 399 [27] Murphy, D.A.; Courtneidge, S.A. The ‘ins’ and ‘outs’ of podosomes and invadopodia: characteristics,  
400 formation and function. *Nature reviews Molecular cell biology* **2011**, *12*, 413–426.
- 401 [28] Alonso, F.; Spuul, P.; Daubon, T.; Kramer, I.; Génot, E. Variations on the theme of podosomes: A matter of  
402 context. *Biochimica et Biophysica Acta (BBA)-Molecular Cell Research* **2019**, *1866*, 545–553.
- 403 [29] Linder, S.; Aepfelbacher, M. Podosomes: adhesion hot-spots of invasive cells. *Trends in cell biology* **2003**,  
404 *13*, 376–385.
- 405 [30] Buccione, R.; Orth, J.D.; McNiven, M.A. Foot and mouth: podosomes, invadopodia and circular dorsal  
406 ruffles. *Nat. Rev. Mol. Cell Biol.* **2004**, *5*, 647–657.
- 407 [31] Jurdic, P.; Saltel, F.; Chabadel, A.; Destaing, O. Podosome and sealing zone: specificity of the osteoclast  
408 model. *European journal of cell biology* **2006**, *85*, 195–202.
- 409 [32] Paterson, E.K.; Courtneidge, S.A. Invadosomes are coming: new insights into function and disease  
410 relevance. *The FEBS journal* **2018**, *285*, 8–27.
- 411 [33] van den Dries, K.; Linder, S.; Maridonneau-Parini, I.; Poincloux, R. Probing the mechanical landscape—new  
412 insights into podosome architecture and mechanics. *Journal of Cell Science* **2019**, *132*.
- 413 [34] Thomas, W. Catch bonds in adhesion. *Annu. Rev. Biomed. Eng.* **2008**, *10*, 39–57.
- 414 [35] Kong, F.; García, A.J.; Mould, A.P.; Humphries, M.J.; Zhu, C. Demonstration of catch bonds between an  
415 integrin and its ligand. *Journal of Cell Biology* **2009**, *185*, 1275–1284.
- 416 [36] Block, M.R.; Badowski, C.; Millon-Fremillon, A.; Bouvard, D.; Bouin, A.P.; Faurobert, E.; Gerber-Scokaert,  
417 D.; Planus, E.; Albiges-Rizo, C. Podosome-type adhesions and focal adhesions, so alike yet so different.  
418 *European journal of cell biology* **2008**, *87*, 491–506.

- 419 [37] Luxenburg, C.; Winograd-Katz, S.; Addadi, L.; Geiger, B. Involvement of actin polymerization in podosome  
420 dynamics. *Journal of cell science* **2012**, *125*, 1666–1672.
- 421 [38] Schachtner, H.; Calaminus, S.D.; Thomas, S.G.; Machesky, L.M. Podosomes in adhesion, migration,  
422 mechanosensing and matrix remodeling. *Cytoskeleton* **2013**, *70*, 572–589.
- 423 [39] Kaverina, I.; Stradal, T.E.; Gimona, M. Podosome formation in cultured A7r5 vascular smooth muscle cells  
424 requires Arp2/3-dependent de-novo actin polymerization at discrete microdomains. *Journal of cell science*  
425 **2003**, *116*, 4915–4924.
- 426 [40] van den Dries, K.; Nahidiazar, L.; Slotman, J.A.; Meddens, M.B.; Pandzic, E.; Joosten, B.; Ansems, M.;  
427 Schouwstra, J.; Meijer, A.; Steen, R.; others. Modular actin nano-architecture enables podosome protrusion  
428 and mechanosensing. *Nature Communications* **2019**, *10*, 1–16.
- 429 [41] Meddens, M.B.; Pandzic, E.; Slotman, J.A.; Guillet, D.; Joosten, B.; Mennens, S.; Paardekooper, L.M.;  
430 Houtsmuller, A.B.; Van Den Dries, K.; Wiseman, P.W.; others. Actomyosin-dependent dynamic spatial  
431 patterns of cytoskeletal components drive mesoscale podosome organization. *Nature communications* **2016**,  
432 *7*, 13127.
- 433 [42] Luxenburg, C.; Addadi, L.; Geiger, B. The molecular dynamics of osteoclast adhesions. *European journal of*  
434 *cell biology* **2006**, *85*, 203–211.
- 435 [43] Luxenburg, C.; Parsons, J.T.; Addadi, L.; Geiger, B. Involvement of the Src-cortactin pathway in  
436 podosome formation and turnover during polarization of cultured osteoclasts. *Journal of cell science*  
437 **2006**, *119*, 4878–4888.
- 438 [44] Destaing, O.; Saltel, F.; Géminard, J.C.; Jurdic, P.; Bard, F. Podosomes display actin turnover and dynamic  
439 self-organization in osteoclasts expressing actin-green fluorescent protein. *Molecular biology of the cell* **2003**,  
440 *14*, 407–416.
- 441 [45] Collin, O.; Tracqui, P.; Stephanou, A.; Usson, Y.; Clément-Lacroix, J.; Planus, E. Spatiotemporal dynamics  
442 of actin-rich adhesion microdomains: influence of substrate flexibility. *Journal of cell science* **2006**,  
443 *119*, 1914–1925.
- 444 [46] Luxenburg, C.; Geblinger, D.; Klein, E.; Anderson, K.; Hanein, D.; Geiger, B.; Addadi, L. The architecture of  
445 the adhesive apparatus of cultured osteoclasts: from podosome formation to sealing zone assembly. *PloS*  
446 *one* **2007**, *2*.
- 447 [47] Driscoll, M.K.; Sun, X.; Guven, C.; Fourkas, J.T.; Losert, W. Cellular contact guidance through dynamic  
448 sensing of nanotopography. *ACS nano* **2014**, *8*, 3546–3555.
- 449 [48] Khamviwath, V.; Hu, J.; Othmer, H.G. A continuum model of actin waves in Dictyostelium discoideum.  
450 *PloS one* **2013**, *8*, e64272.
- 451 [49] Brzeska, H.; Pridham, K.; Chery, G.; Titus, M.A.; Korn, E.D. The association of myosin IB with actin waves  
452 in Dictyostelium requires both the plasma membrane-binding site and actin-binding region in the myosin  
453 tail. *PloS one* **2014**, *9*, e94306.
- 454 [50] Kruse, K. Cell Crawling Driven by Spontaneous Actin Polymerization Waves. In *Physical Models of Cell*  
455 *Motility*; Springer, 2016; pp. 69–93.
- 456 [51] van den Dries, K.; van Helden, S.F.; Te Riet, J.; Diez-Ahedo, R.; Manzo, C.; Oud, M.M.; van Leeuwen,  
457 F.N.; Brock, R.; Garcia-Parajo, M.F.; Cambi, A.; others. Geometry sensing by dendritic cells dictates  
458 spatial organization and PGE 2-induced dissolution of podosomes. *Cellular and molecular life sciences* **2012**,  
459 *69*, 1889–1901.
- 460 [52] Rafiq, N.B.M.; Grenzi, G.; Lim, C.K.; Kozlov, M.M.; Jones, G.E.; Viasnoff, V.; Bershadsky, A.D. Forces and  
461 constraints controlling podosome assembly and disassembly. *Philosophical Transactions of the Royal Society B*  
462 **2019**, *374*, 20180228.
- 463 [53] Linder, S. The matrix corroded: podosomes and invadopodia in extracellular matrix degradation. *Trends*  
464 *in cell biology* **2007**, *17*, 107–117.
- 465 [54] Atilgan, E.; Wirtz, D.; Sun, S.X. Mechanics and dynamics of actin-driven thin membrane protrusions.  
466 *Biophysical journal* **2006**, *90*, 65–76.
- 467 [55] Cohen, M.; Joester, D.; Geiger, B.; Addadi, L. Spatial and temporal sequence of events in cell adhesion:  
468 from molecular recognition to focal adhesion assembly. *ChemBiochem* **2004**, *5*, 1393–1399.
- 469 [56] Loomis, W.F.; Fuller, D.; Gutierrez, E.; Groisman, A.; Rappel, W.J. Innate non-specific cell substratum  
470 adhesion. *PloS one* **2012**, *7*, e42033.

471 © 2020 by the authors. Submitted to *Cells* for possible open access publication under the terms and conditions of  
472 the Creative Commons Attribution (CC BY) license (<http://creativecommons.org/licenses/by/4.0/>).
